## Transcatheter aortic valve replacement in severe aortic stenosis and cardiac amyloidosis: a systematic review and meta-analysis

G. Pinto<sup>1</sup>, A. Villaschi<sup>1</sup>, J. Sanz-Sanchez<sup>2</sup>, F. Fazzari<sup>3</sup>, D. Regazzoli<sup>3</sup>, A. Mangieri<sup>3</sup>, D. Pini<sup>3</sup>, R.M. Bragato<sup>3</sup>, A. Colombo<sup>3</sup>, B. Reimers<sup>3</sup>, G. Condorelli<sup>1</sup>, G.G. Stefanini<sup>1</sup>, M. Chiarito<sup>1</sup>, F. Cannata<sup>1</sup>

<sup>1</sup>Humanitas University, Department of Biomedical Sciences, Pieve Emanuele - Milan, Italy; <sup>2</sup>Hospital Universitario y Politecnico La Fe, Valencia, Spain; <sup>3</sup>IRCCS Humanitas Research Hospital, Rozzano - Milano, Italy

**Funding Acknowledgement:** Type of funding sources: None.

**Background:** Aortic stenosis (AS) and cardiac amyloidosis (CA) are typical degenerative diseases of the elderly. According to recent studies, up to 16% of patients referred to transcatheter aortic valve replacement (TAVR) have a concomitant diagnosis of CA. Until recently, TAVR in patients with CA and AS has been considered futile, following the results of small observational studies. However, few studies recently suggested a beneficial impact of TAVR in patients with AS and CA as compared with medical therapy alone.

**Purpose:** To clarify the efficacy and safety profile of TAVR in CA-AS patients.

**Methods:** We performed a systematic review and meta-analysis of studies evaluating the risk of mortality after TAVR in CA-AS patients as compared with medical therapy. Moreover, we performed a systematic review and descriptive meta-analysis of studies reporting outcomes and complication rates of TAVR in CA-AS patients as compared with patients with AS alone.

**Results:** We identified 4 observational studies reporting data on mortality in CA-AS patients treated with either TAVR or medical therapy. Mortality

was significantly lower in patients undergoing TAVR (OR 0.23, 95% CI 0.07–0.73,  $I^2=0\%$ , NNT=2.6) as compared with medical therapy. A sensitivity analysis with hazard ratio as effect estimate showed consistent results. Then, we identified 4 observational studies reporting data on mortality, re-hospitalizations and periprocedural complications of TAVR in CA-AS patients as compared with patients with AS alone. We found higher rates of mortality, cardiovascular hospitalization and need for permanent pacemaker implantation in CA-AS patients as compared to lone AS patients undergoing TAVR. Conversely, no differences were found in terms of stroke, acute kidney injury and vascular complications.

**Conclusions:** Our analysis rejects the idea of futility of TAVR in CA-AS patients showing a clear survival benefit of CA-AS patients undergoing TAVR as compared with medical therapy. Moreover, these patients may undergo TAVR with an acceptable procedural risk, that is substantially comparable to lone AS patients, except for a higher incidence of permanent pacemaker implantation.

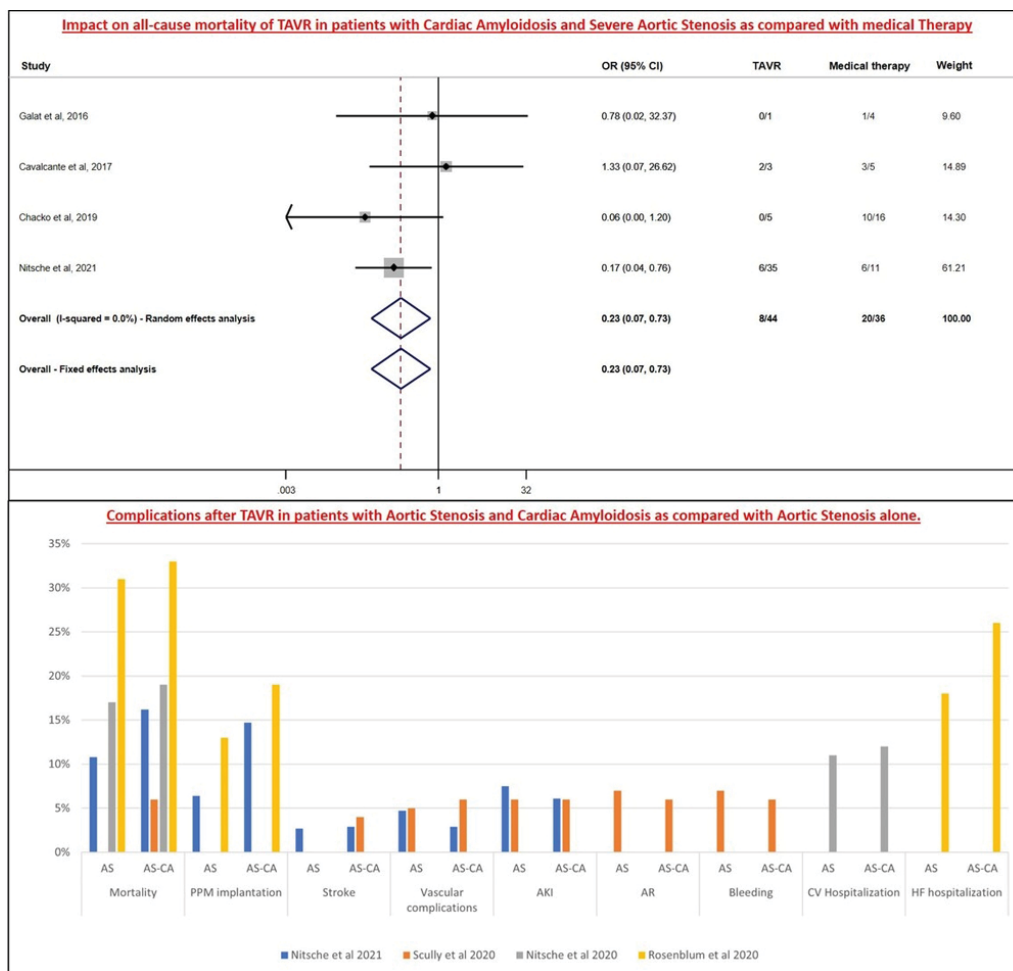

Source: http://academic.oup.com/eurheartj/article-pdf/42/Supplement_1/ehab724.1650/40589038/ehab724.1650.pdf
